# Supplementary material for: Consensus guidance for monitoring individuals with islet autoantibody-positive pre-stage 3 type 1 diabetes
Source: PubMed Central journal article supplement (PMC11410955; doi:10.1007/s00125-024-06205-5), 2024-06-24
Supplement: 125_2024_6205_MOESM1_ESM.pdf [file 125_2024_6205_MOESM1_ESM.pdf]

**Supplementary materials**

**Consensus guidance for monitoring individuals with islet autoantibody-positive pre-stage 3 type 1 diabetes**

**Moshe Phillip et al**

**ESM Table 1. ADA evidence-grading system for Standards of Care in Diabetes\***

| <b>Level of evidence</b> | <b>Description</b>                                                                                                                                                                                                                                                                                                                                                                                                                                                                                                                                                                                                                                          |
|--------------------------|-------------------------------------------------------------------------------------------------------------------------------------------------------------------------------------------------------------------------------------------------------------------------------------------------------------------------------------------------------------------------------------------------------------------------------------------------------------------------------------------------------------------------------------------------------------------------------------------------------------------------------------------------------------|
| <b>A</b>                 | <p>Clear evidence from well-conducted, generalizable randomized controlled trials that are adequately powered, including:</p> <ul style="list-style-type: none"><li>• Evidence from a well-conducted multicenter trial</li><li>• Evidence from a meta-analysis that incorporated quality ratings in the analysis</li></ul> <p>Supportive evidence from well-conducted randomized controlled trials that are adequately powered, including:</p> <ul style="list-style-type: none"><li>• Evidence from a well-conducted trial at one or more institutions</li><li>• Evidence from a meta-analysis that incorporated quality ratings in the analysis</li></ul> |
| <b>B</b>                 | <p>Supportive evidence from well-conducted cohort studies</p> <ul style="list-style-type: none"><li>• Evidence from a well-conducted prospective cohort study or registry</li><li>• Evidence from a well-conducted meta-analysis of cohort studies</li></ul> <p>Supportive evidence from a well-conducted case-control study</p>                                                                                                                                                                                                                                                                                                                            |
| <b>C</b>                 | <p>Supportive evidence from poorly controlled or uncontrolled studies</p> <ul style="list-style-type: none"><li>• Evidence from randomized clinical trials with one or more major or three or more minor methodological flaws that could invalidate the results</li><li>• Evidence from observational studies with high potential for bias (such as case series with comparison with historical controls)</li><li>• Evidence from case series or case reports</li></ul> <p>Conflicting evidence with the weight of evidence supporting the recommendation</p>                                                                                               |
| <b>E</b>                 | <p>Expert consensus or clinical experience</p>                                                                                                                                                                                                                                                                                                                                                                                                                                                                                                                                                                                                              |

\* Reproduced from [75], American Diabetes Association, 2023. Copyright and all rights reserved. Material from this publication has been used with the permission of American Diabetes Association.
